1 **Integrative transcriptome analysis of malignant pleural mesothelioma reveals a**  
2 **clinically relevant immune-based classification**

3 Ania Alay<sup>1,2</sup>, David Cordero<sup>1,2,3</sup>, Sara Hijazo-Pechero<sup>1,2</sup>, Elisabet Aliagas<sup>2</sup>, Adriana  
4 Lopez-Doriga<sup>1,2,3</sup>, Raúl Marín<sup>1,2</sup>, Ramón Palmero<sup>2,4</sup>, Roger Llatjós<sup>5</sup>, Ignacio  
5 Escobar<sup>6</sup>, Ricard Ramos<sup>6</sup>, Susana Padrones<sup>7</sup>, Víctor Moreno<sup>2,3,8</sup>, Ernest Nadal<sup>2,4,\*</sup>,  
6 Xavier Solé<sup>1,2,3,\*</sup>

7 \* Joint senior authors

8 <sup>1</sup> Unit of Bioinformatics for Precision Oncology, Catalan Institute of Oncology (ICO),  
9 L'Hospitalet de Llobregat, Barcelona, Spain.

10 <sup>2</sup> Molecular Mechanisms and Experimental Therapy in Oncology Program  
11 (Oncobell), Bellvitge Biomedical Research Institute (IDIBELL), L'Hospitalet de  
12 Llobregat, Barcelona, Spain.

13 <sup>3</sup> CIBER (Consortio de Investigación Biomédica en Red) Epidemiología y Salud  
14 Pública (CIBERESP), Madrid, Spain.

15 <sup>4</sup> Thoracic Oncology Unit, Department of Medical Oncology, Catalan Institute of  
16 Oncology (ICO), L'Hospitalet del Llobregat, Barcelona, Spain.

17 <sup>5</sup> Department of Pathology. Hospital Universitari de Bellvitge, Bellvitge Biomedical  
18 Research Institute (IDIBELL), L'Hospitalet de Llobregat, Barcelona, Spain.

19 <sup>6</sup> Department of Thoracic Surgery. Hospital Universitari de Bellvitge, Bellvitge  
20 Biomedical Research Institute (IDIBELL), L'Hospitalet de Llobregat, Barcelona,  
21 Spain.

22 <sup>7</sup> Department of Respiratory Medicine. Hospital Universitari de Bellvitge, Bellvitge  
23 Biomedical Research Institute (IDIBELL), L'Hospitalet de Llobregat, Barcelona,  
24 Spain.

NOTE: This preprint reports new research that has not been certified by peer review and should not be used to guide clinical practice.

25 <sup>8</sup> Oncology Data Analytics Program, Catalan Institute of Oncology (ICO) and  
26 Department of Clinical Sciences, Faculty of Medicine, University of Barcelona,  
27 L'Hospitalet de Llobregat, Barcelona, Spain.

28

29 Corresponding authors:

30 Xavier Solé. Unit of Bioinformatics for Precision Oncology, Oncology Data Analytics  
31 Program, Catalan Institute of Oncology (ICO). Granvia de l'Hospitalet 199-203 (2nd  
32 floor), 08908 L'Hospitalet de Llobregat (Barcelona), Spain; E-mail:  
33 [x.sole@iconcologia.net](mailto:x.sole@iconcologia.net)

34

35 Ernest Nadal. Thoracic Oncology Unit, Department of Medical Oncology, Catalan  
36 Institute of Oncology (ICO). Granvia de l'Hospitalet 199-203 (2nd floor), 08908  
37 L'Hospitalet de Llobregat (Barcelona), Spain; E-mail: [esnadal@iconcologia.net](mailto:esnadal@iconcologia.net)

38

39 Keywords: Lung Neoplasms; Gene Expression Profiling; Tumor Microenvironment;  
40 Computational Biology; Tumor Biomarkers

41 Abstract

42 **Background.** Malignant pleural mesothelioma (MPM) is a rare and aggressive  
43 neoplasia affecting the lung mesothelium. Immune checkpoint inhibitors (ICI) in MPM  
44 have not been extremely successful, likely due to poor identification of suitable  
45 candidate patients for the therapy. We aimed to identify cellular immune fractions  
46 associated with clinical outcome and classify MPM patients based on their immune  
47 contexture. For each defined group, we sought for molecular specificities that could  
48 help further define our MPM classification at the genomic and transcriptomic level, as  
49 well as identify differential therapeutic strategies based on transcriptional signatures  
50 predictive of drug response.

51 **Methods.** The abundance of 20 immune cell fractions in 516 MPM samples from 7  
52 gene expression datasets was inferred using Gene Set Variation Analysis.  
53 Identification of clinically relevant fractions was performed with Cox Proportional-  
54 Hazards Models adjusted for age, stage, sex, and tumor histology. Immune-based  
55 groups were identified using unsupervised classification.

56 **Results.** T-Helper 2 ( $T_{H2}$ ) and cytotoxic T ( $T_C$ ) cells were found to be consistently  
57 associated with overall survival. Three immune clusters (IG) were subsequently  
58 defined based on  $T_{H2}$  and  $T_C$  immune infiltration levels: IG1 (54.5%) was  
59 characterized by high  $T_{H2}$  and low  $T_C$  levels, IG2 (37%) had either low or high levels  
60 of both fractions, and IG3 (8.5%) was defined by low  $T_{H2}$  and high  $T_C$  levels. IG1 and  
61 IG3 groups were associated with worse and better overall survival, respectively. The  
62 three groups showed differential molecular profiles, with IG1 enriched for *CDKN2A*  
63 and IFN-related genes deletions. At the transcriptional level, IG1 samples showed  
64 upregulation of proliferation signatures, while IG3 samples presented upregulation of  
65 immune and inflammation-related pathways. Finally, the integration of gene

66 expression with functional signatures of drug response showed that IG3 patients  
67 might be more likely to respond to ICI, while IG1 patients could be more sensitive to  
68 PARP inhibitors.

69 **Conclusions.** This study identifies a novel immune-based signature with potential  
70 clinical relevance based on T<sub>H2</sub> and T<sub>C</sub> levels, unveiling a fraction of MPM patients  
71 with better prognosis and who might benefit from immune-based therapies. Genomic  
72 and transcriptomic specificities of the different groups could be used to tailor  
73 potential therapies in the future.

74

75 Main text

## 76 **BACKGROUND**

77 Malignant pleural mesothelioma (MPM) is a rare and highly aggressive neoplasia  
78 arising in the pleural cavity, and its incidence is increasing worldwide. MPM tumors  
79 are classified into three distinct histological subtypes: epithelioid, biphasic, and  
80 sarcomatoid. Median overall survival in MPM patients is approximately 12 months,  
81 although patients with epithelioid tumors usually have better prognosis than  
82 individuals with biphasic or sarcomatoid MPM.[1] Furthermore, most patients are  
83 diagnosed in advanced stages, which still aggravates the burden caused by the  
84 disease. The use of surgery in MPM patients is very limited, and current standard of  
85 care treatment for MPM patients is chemotherapy with platinum combined with  
86 pemetrexed, which has been shown to improve overall survival and quality of life.[2]  
87 However, benefits from chemotherapy are generally modest and prognosis remains  
88 dismal with 5-year survival rates lower than 5%.[3] Furthermore, there is no standard  
89 second line treatment when tumor progresses to front-line chemotherapy.

90

91 Immunotherapy based on monoclonal antibodies against programmed cell death  
92 protein 1 (PD-1) and programmed death ligand 1 (PD-L1) have been tested in  
93 clinical trials in MPM. Several nonrandomized phase I/II trials testing single-agent  
94 immune checkpoint inhibitors showed antitumor activity (9-29%) and median  
95 progression-free survival ranging from 2.8 to 6.2 months.[4] Preliminary results from  
96 phase II clinical trials combining in second line inhibitors of cytotoxic T-lymphocyte-  
97 associated antigen 4 (CTLA4) plus anti-PD1/PD-L1, such as ipilimumab and  
98 nivolumab or tremelimumab and durvalumab, showed promising efficacy results and  
99 also significant toxicity.[5] In those clinical trials, PD-L1 expression had limited value  
100 to predict benefit from immune checkpoint inhibitors. Moreover, tumor mutational  
101 burden (TMB) which is generally low in MPM[6] is not likely to become a predictive  
102 marker in this tumor. Therefore, it is essential to further study the role of the different  
103 components of the immune system in the evolution and prognosis of MPM, as well  
104 as the identification of additional biomarkers of immunotherapy response beyond  
105 PD-L1 immuno-histochemical expression.

106

107 In this study, our aim is to capture the landscape of the immune microenvironment in  
108 a large collection of 516 MPM gene expression profiles comprised in seven different  
109 publicly available datasets.[6–12] Once the immune contexture is determined for  
110 every tumor, we will identify those immune cell fractions with potential prognostic  
111 ability and classify MPM samples based on these previously identified clinically-  
112 relevant immune cell types. We will subsequently use the defined MPM groups to  
113 identify genomic and transcriptomic group specificities and evaluate functional  
114 signatures of drug response to suggest possible therapeutic strategies.

115

## 116 **METHODS**

### 117 **Data collection and processing**

118 A systematic search to identify publicly available datasets was performed in January  
119 2018 using the query “pleural mesothelioma” and filtering to keep only human  
120 samples and expression profiling experiments in multiple open access repositories.  
121 We also filtered datasets with less than 30 samples and kept experiments that  
122 covered most of the transcriptome. Raw data were downloaded whenever possible  
123 and subsequently processed accordingly as summarized hereafter: for whole-exome  
124 sequencing data, Broad’s Genome Analysis Toolkit best practices were followed,[13]  
125 RNA-sequencing data was processed according to an in-house pipeline based on  
126 ENCODE best practices, and for expression arrays, robust multiarray average  
127 algorithm[14] was used to normalize the data. A detailed description of data  
128 identification and data processing is available in extended methods.

129

### 130 **Association of immune fractions with overall survival**

131 The immune infiltrate composition of 20 different cell types was deconvoluted from  
132 the obtained gene expression profiles using Gene Set Variation Analysis (GSVA)  
133 method.[15] Gene signatures of the different immune fractions were obtained from a  
134 previous study[16] in which signatures for a total of 28 different immune cell types  
135 were generated, including innate immune cells (e.g., dendritic cells, eosinophils,  
136 mast cells, macrophages, natural killer cells, neutrophils) and adaptive immune cells  
137 (e.g., B cells, T cells). Since GSVA can only deconvolute multi-gene signatures, we  
138 replaced two single-gene signatures (plasmacytoid dendritic cells and regulatory T  
139 cells) with their corresponding multi-gene signatures from another study.[17]  
140 Additionally, when more specific categories were available for a cellular fraction (e.g.

141 NK CD56dim and NK CD56bright), general categories (e.g. NK cells) were removed  
142 to avoid signature redundancy.

143

144 Once relative abundances for each immune fraction and sample were obtained,  
145 Cox proportional-hazards models adjusted for sex, stage, age, and histology were  
146 fitted using the largest dataset with available survival information as the discovery  
147 dataset,[6] and setting the optimal cut point that maximized survival differences for  
148 each immune fraction using R packages *survival* (v.3.1.7) and *survMisc* (v.0.5.5).  
149 Using the GSVA cut points defined in the discovery dataset, Cox proportional-  
150 hazards models adjusted for age, stage, sex, and histology were fitted in two  
151 additional validation datasets.[7,10] Fractions associated to clinical outcome were  
152 determined as those significant ( $p < 0.05$ ) after FDR adjustment in the discovery  
153 dataset and at least one validation dataset, and with a consistent hazard ratio across  
154 the three datasets.

155

## 156 **Group characterization**

### 157 *Clinicopathological variables*

158 Association with clinicopathological variables (age, sex, stage, tumor histology,  
159 asbestos exposure, and neoadjuvant therapy) was done using *compareGroups*  
160 package for R (v.4.2.0). For categorical variables, a Chi-squared test was performed,  
161 and continuous variables were tested using Kruskal-Wallis test.

162

### 163 *Immune checkpoints and T cell exhaustion status*

164 To assess immune checkpoints status and T cell exhaustion status in the different  
165 immune groups, multiple sets of genes were obtained from previous studies,

166 including lists of immune checkpoint activators, immune checkpoint inhibitors,[18]  
167 and T cell exhaustion and effector markers.[19] For each gene, we performed a  
168 linear model adjusted for sex, age, stage, and histology in each dataset, where the  
169 immune group was codified as a numeric variable and the gene expression was the  
170 dependent variable. Datasets with less than three samples in any immune group  
171 were discarded. The weighted Z method from the *survcomp* package (v.1.36.0) was  
172 used to combine the p-values obtained for the different datasets. Bonferroni adjusted  
173 p-values lower than 0.05 were considered as significant.  $\beta$  values were combined  
174 using the weighted mean.

175

#### 176 *Genomic alterations*

177 Both Bueno et al. and Hmeljak et al. datasets had somatic variant data available to  
178 evaluate the mutational burden. The total number of variants per sample was  
179 calculated excluding non-exonic and synonymous mutations. Using somatic single  
180 nucleotide variants, mutational signatures were inferred using the R package  
181 *deconstructSigs* (v.1.8.0). Neoepitope binding affinity was also derived from somatic  
182 single nucleotide variants. More details on these analyses are available in extended  
183 methods.

184 Copy number alteration burden was evaluated in the samples from the Hmeljak et al.  
185 dataset. Fisher tests were computed to assess the differences between immune  
186 groups in terms of number of altered/lost/gained genes. R package *copynumber*  
187 (v.1.24.0) was used to plot the genome overview of altered samples.

188

#### 189 *Transcriptomic analysis*



190 The association of the expression levels of individual genes with the immune groups  
191 was done as described in the immune checkpoint evaluation section. For pathway  
192 analysis, a pre-ranked Gene Set Enrichment Analysis (GSEA) was run with genes  
193 ranked using the product of the slope and the negative  $\log_{10}(\text{p-value})$  from the linear  
194 model used to assess transcriptomic status at the single-gene level. Gene sets  
195 tested included hallmarks and canonical pathways (KEGG, Biocarta, Reactome)  
196 from MSigDB version 6.1.[20]

197

### 198 *Assessment of response to therapy*

199 Transcriptional signatures of sensitivity or resistance to specific treatments were  
200 used to compute GSVA scores for each sample. The tested signatures were:  
201 pemetrexed resistance,[21] cisplatin resistance,[22] PARP inhibitors sensitivity,[23]  
202 and palbociclib resistance,[24] as well as multiple signatures predictive of benefit to  
203 immunotherapy found after a systematic search literature. A total of seven previously  
204 published studies with publicly available transcriptomic signatures were found.[25–  
205 31] Signatures with less than 10 genes were filtered out and linear models were  
206 fitted to obtain the slope of the signature correlation with the immune groups.  
207 Analysis of variance was used to test for significance of the models adjusted for  
208 histology and dataset.

209

## 210 **RESULTS**

### 211 **Profiling of immune fractions in a large cohort of MPM tumors leads to** 212 **clinically relevant immune cell populations**

213 In order to identify clinically relevant immune-cell fractions in MPM tumors, we  
214 collected data from seven MPM gene expression datasets that fulfilled our selection

215 criteria.[6–12] Overall, we collected 516 MPM gene expression profiles, with  
216 available survival information and covariates for 300 patients (58%). A summary of  
217 the clinicopathological characteristics of the samples in each dataset is available in  
218 Suppl. Table S1.

219 For each sample included in the analysis, we quantified the abundance of 20  
220 immune-cell populations by applying GSVA[15] on a previously established set of  
221 immune-specific gene signatures (Suppl. Table S2).[16,17] Thus, for each sample  
222 and immune cellular fraction, we obtained a score between [-1, +1], with extreme  
223 values close to 1 or -1 indicating a strong presence or absence of a fraction in a  
224 specific sample, respectively. Similarly, GSVA scores close to 0 correspond to an  
225 unbiased distribution (i.e., centered or randomly distributed) of the genes across the  
226 whole gene expression profile.

227 Once the abundance of all immune fractions was quantified in the full cohort of  
228 samples, we aimed to assess whether there existed any individual fractions  
229 associated with overall patient survival using Cox proportional-hazards regression  
230 models adjusted for potential confounders (i.e., age, sex, tumor stage, histology, and  
231 dataset). Thus, for each cell type we identified the cut point that maximized the  
232 survival differences between high vs. low using the largest available dataset (Bueno  
233 et al.[6]). The cut points obtained in the discovery dataset were further validated in  
234 the two additional cohorts with available survival information (Hmeljak et al.[7] and  
235 Bott et al.[10]). Out of the 20 studied immune cell types, T helper 2 (T<sub>H2</sub>) and  
236 cytotoxic T cells (T<sub>C</sub>) showed a consistent association with patient survival across  
237 datasets based on our criteria (Cox  $p < 0.05$  in at least 2 of the three datasets, and  
238 the remaining dataset showing a consistent trend, albeit not necessarily significant).  
239 In our analysis, higher levels of T<sub>H2</sub> cells (GSVA score  $> -0.16$ ) were associated with

240 worse outcome ( $HR_{Bueno}=2.1$ ,  $p=0.00015$ ;  $HR_{Hmeljak}=2.6$ ,  $p=0.0021$ ;  $HR_{Bott}=2.3$ ,  
241  $p=0.066$ ;  $HR_{Combined}=2.1$ ,  $p=7.6 \cdot 10^{-7}$ ) (Fig. 1A), while higher levels of  $T_C$  (GSVA score  
242  $> 0.40$ ) were associated with better prognosis ( $HR_{Bueno}=0.57$ ,  $p=0.0091$ ;  
243  $HR_{Hmeljak}=0.73$ ,  $p=0.39$ ;  $HR_{Bott}=0.29$ ,  $p=0.016$ ;  $HR_{Combined}=0.59$ ,  $p=0.00094$ ) (Fig. 1B).  
244 Survival analysis results for the complete set of immune fractions can be found in  
245 Suppl. Fig. S1. When individuals were stratified in four groups based on the  
246 combination of the abundance (i.e., low vs. high) of both  $T_{H2}$  and  $T_C$  cells, MPM  
247 patients with low abundance of  $T_{H2}$  and high  $T_C$  infiltration consistently showed the  
248 best overall survival when compared to patients with high levels of  $T_{H2}$  and low levels  
249 of  $T_C$  ( $HR_{Bueno}=0.34$ ,  $p=0.00022$ ;  $HR_{Hmeljak}=0.20$ ,  $p=0.0080$ ;  $HR_{Bott}=0.12$ ,  $p=0.020$ ;  
250  $HR_{Combined}=0.31$ ,  $p=2.7 \cdot 10^{-7}$ ) (Fig. 1C). Additionally, patients with either both high or  
251 low abundance levels of both cell types showed intermediate prognosis, suggesting  
252 some type of compensatory effect between these two immune cell types. Therefore,  
253 we decided to merge these two groups into a single category to create a final  
254 classification of three immune-based groups:  $T_{H2}High-T_CLow$  (IG1, worse prognosis,  
255 54.5% of the patients),  $T_{H2}High-T_CHigh$  or  $T_{H2}Low-T_CLow$  (IG2, intermediate  
256 prognosis, 37% of the patients,  $HR_{Combined}=0.52$ ),  $T_{H2}Low-T_CHigh$  (IG3, better  
257 prognosis, 8.5% of the patients,  $HR_{Combined}=0.32$ ) (Fig. 1D).

258

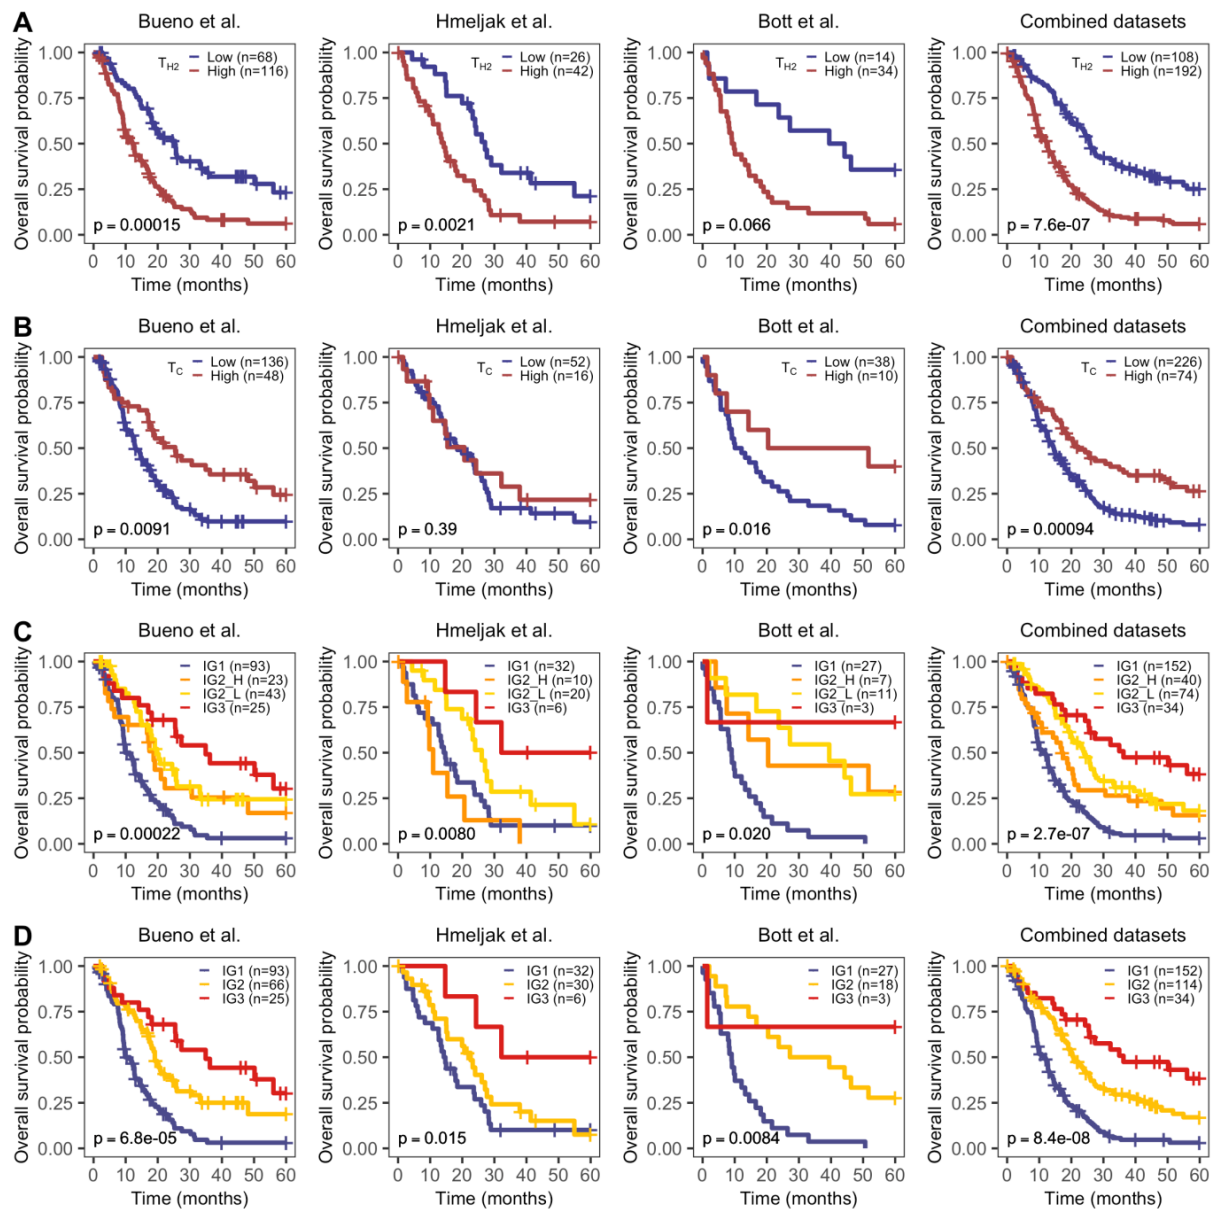

259

260 **Figure 1.** Overall survival by significant immune fractions.

261 Kaplan-Meier curves of T-helper 2 cells (A), cytotoxic T cells (B), the combination of both  
 262 fractions in 4 groups (C), and in 3 groups (D). Hazard ratios (HR) and p-values come from a  
 263 Cox proportional-hazards model adjusted for age, sex, stage, and histology.

264

265 Once the immune-based MPM groups were defined, we aimed to identify any  
 266 potential differences in the remaining immune fractions among them. Groups IG1  
 267 and IG2 comprised a mixture of samples with both strongly and less immune-  
 268 enriched tumors, while on average group IG3 showed significant higher abundance

269 for 13 of the 20 immune cell fractions (Fig. 2A, Suppl. Fig. S2). These results  
270 suggest that the combination of these two immune fractions interplays with the  
271 remaining immune cell types and contributes to identify a subset of highly immune-  
272 infiltrated MPM tumors with improved prognosis.

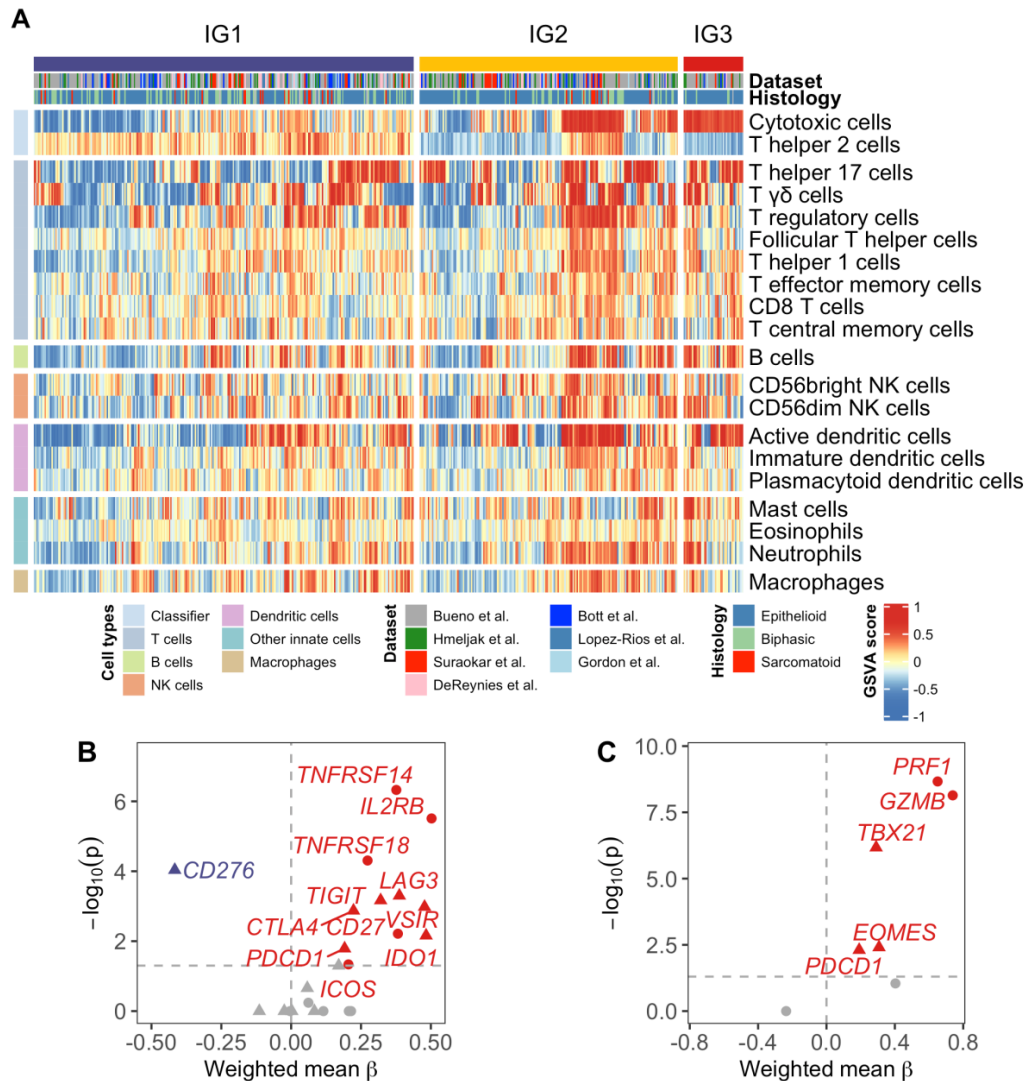

273

274 **Figure 2.** A) Relative abundances of the 20 immune fractions among 516 MPM tumours.

275 Samples are stratified in each group and clustered using Ward's method and Euclidean

276 distance. B) Volcano plot of immune checkpoints inhibitors (triangle) and activators (dot).

277 Effect size ( $\beta$ ) correlates with immune groups: negative  $\beta$  values correspond to decreasing

278 expression from IG1 to IG3, while positive values indicate increasing expression from IG1 to

279 IG3. Grey-coloured dots are not significant. C) Volcano plot of T-cell exhaustion (triangle)

280 and effector (dot) markers. Effect size ( $\beta$ ) correlates with immune groups. Grey-coloured  
281 dots are not significant.

282

283 In order to explore potential additional clinical correlates of the three identified MPM  
284 immune groups, we analyzed their association with available clinical covariates: age,  
285 sex, tumor stage at the time of diagnosis, tumor histology, asbestos exposure, and  
286 neoadjuvant therapy. Out of all the variables explored, we identified a significant  
287 association with age and histology (Table 1). Patients' median age in group IG1 is 66  
288 years, compared to 63.7 years and 63.2 years for groups IG2 and IG3, respectively  
289 ( $p=0.021$ ). Regarding tumor histology, IG3 showed a strong enrichment in epithelioid  
290 tumors (90.70% in IG3 vs 62.04% in IG1 and 73.68% in IG2,  $p=0.001$ ).

|                                | N   | IG1<br>N=281             | IG2<br>N=191           | IG3<br>N=44            | p-value |
|--------------------------------|-----|--------------------------|------------------------|------------------------|---------|
| Age, Median<br>(Range)         | 385 | 66.00<br>(28.00 - 86.00) | 63.70<br>(30.20-84.50) | 63.20<br>(18.80-76.00) | 0.021   |
| Sex, N (%):                    | 385 |                          |                        |                        | 0.115   |
| Male                           |     | 166 (83.42%)             | 120 (81.63%)           | 27 (69.23%)            |         |
| Female                         |     | 33 (16.58%)              | 27 (18.37%)            | 12 (30.77%)            |         |
| Stage, N (%):                  | 348 |                          |                        |                        | 0.888   |
| Stage I                        |     | 10 (5.32%)               | 9 (7.26%)              | 3 (8.33%)              |         |
| Stage II                       |     | 33 (17.55%)              | 21 (16.94%)            | 7 (19.44%)             |         |
| Stage III                      |     | 108 (57.45%)             | 68 (54.84%)            | 22 (61.11%)            |         |
| Stage IV                       |     | 37 (19.68%)              | 26 (20.97%)            | 4 (11.11%)             |         |
| Histology, N (%):              | 507 |                          |                        |                        | 0.001   |
| Epithelioid                    |     | 170 (62.04%)             | 140 (73.68%)           | 39 (90.70%)            |         |
| Biphasic                       |     | 84 (30.66%)              | 39 (20.53%)            | 4 (9.30%)              |         |
| Sarcomatoid                    |     | 20 (7.30%)               | 11 (5.79%)             | 0 (0.00%)              |         |
| Asbestos<br>exposure, N (%):   | 351 |                          |                        |                        | 0.068   |
| No                             |     | 41 (22.53%)              | 42 (31.82%)            | 15 (40.54%)            |         |
| Possible                       |     | 1 (0.55%)                | 2 (1.52%)              | 1 (2.70%)              |         |
| Yes                            |     | 140 (76.92%)             | 88 (66.67%)            | 21 (56.76%)            |         |
| Neoadjuvant<br>therapy, N (%): | 325 |                          |                        |                        | 0.11    |
| No                             |     | 163 (93.68%)             | 101 (87.07%)           | 30 (85.71%)            |         |
| Yes                            |     | 11 (6.32%)               | 15 (12.93%)            | 5 (14.29%)             |         |

291 **Table 1.** Summary of clinicopathological variables by immune group.

292 To further exclude a potential confounding role of the tumor histology on the  
293 differential survival among the immune groups, we evaluated whether the immune-  
294 based classification still was associated with patient survival within both epithelioid  
295 and non-epithelioid tumors. In epithelioid tumors, we observed improved survival in  
296 IG2 and IG3 patients compared to IG1 ( $HR_{IG2}=0.47$ ,  $HR_{IG3}=0.24$ ,  $p=3.3 \cdot 10^{-8}$ ) (Suppl.  
297 Fig. S3A). For non-epithelioid tumors, the very small number of IG3 patients ( $n=3$ )  
298 prevented us from obtaining reliable results for this subgroup, but we still observed a  
299 trend towards better survival in IG2 patients compared to IG1 ( $HR_{IG2}=0.60$ ,  $p=0.074$ )  
300 (Suppl. Fig. S3B).

301

### 302 **Immune groups correlate with most immune checkpoint markers and markers** 303 **of effector and exhausted T cells**

304 To further evaluate the potential clinical relevance of the identified immune groups,  
305 we evaluated the expression of a wide selection of immune checkpoint inhibitors and  
306 activators. We observed a significant increasing expression pattern across MPM  
307 immune groups for most of the evaluated checkpoint markers (Fig. 2B). *TNFRSF14*,  
308 *IL2RB*, *TNFRSF18 (GITR)*, *CD27* and *ICOS* were among the strongest positively  
309 associated activator markers with the immune groups. Regarding immune  
310 checkpoint inhibitors, *LAG3*, *TIGIT*, *VSIR (VISTA)*, *IDO1*, *CTLA4* and *PDCD1 (PD-1)*  
311 were the strongest correlated markers. In opposition, *CD276 (B7-H3)* showed  
312 negative correlation with the immune groups, being its expression higher in IG1  
313 tumors than tumors in IG2 and IG3 groups. Detailed expression of *CD274 (PD-L1)*,  
314 *PDCD1 (PD-1)*, *CTLA4*, *CD276 (B7-H3)*, and *VSIR (VISTA)* in each dataset is  
315 available in Suppl. Fig. S4A, showing the distribution of tumors in each group. An  
316 overall higher expression of *VSIR* with respect to the other immune checkpoints is

317 observed, as previously reported in other publications. [7,32] Importantly, immune  
318 groups still show significant differences in prognosis independently of the expression  
319 level of any of these five immune checkpoints (Suppl. Fig. S4B). Additionally, we  
320 also evaluated markers of effector and exhausted T cells correlated with the  
321 identified MPM immune groups (Fig. 2C). In our analysis, all evaluated markers –  
322 excluding *CD44* – showed a positive correlation with the immune group  
323 classification, with a majority being significantly enriched in IG3 (*PRF1, GZB, TBX21,*  
324 *EOMES, PDCD1*).

325

### 326 **Genomic characterization reveals IG1 tumors present more genomic instability**

327 Once we identified the different immune-based groups in MPM tumors and  
328 established their potential clinical relevance, we wanted to characterize the different  
329 groups at the genomic level to identify any potential differential genomic patterns.  
330 These analyses were performed using Bueno et al.[6] and Hmeljak et al.[7] datasets.  
331 Using whole-exome data from Bueno et al.[6] and Hmeljak et al.[7] datasets, we  
332 assessed if immune groups were different in terms of TMB, mutational  
333 signatures,[33] or antigen immunogenicity (Fig. 3A-C). Although we did not find  
334 statistically significant differences among immune groups for any of the previous  
335 analyses, we did observe a slight decrease of mutational Signature 3 in IG3 tumors  
336 compared to IG1 and IG2 patients. Signature 3 is associated with homologous  
337 recombination deficiency and *BRCA1/2* deficiency.[33] Additionally, at the single-  
338 gene level no gene was found to be preferentially mutated in any group (data not  
339 shown).

340 Copy number alterations were assessed for Hmeljak et al. dataset.[7] There were no  
341 significant differences between immune groups in the overall number of altered



342 genes per sample, although tumors in IG3 tend to have fewer copy number  
343 alterations overall compared to the other groups as shown in Figure 3D. Figure 3E  
344 shows the overall percentage of altered samples across the genome for each  
345 immune group. Regarding MPM landmark genes, genes like *BAP1*, *SETD2*, *LATS2*,  
346 *TP53* and *NF2* did not show differences between groups. *CDKN2A* however is  
347 altered in 81% of tumors in IG1, in 47% of tumors in IG2, and 14% of tumors in IG3.  
348 Suppl. Fig. S5 shows expression of frequent tumor suppressor genes inactivated in  
349 MPM,[3] and results correlate with genomics, as *CDKN2A* expression is strongly  
350 correlated with immune groups in the largest datasets.

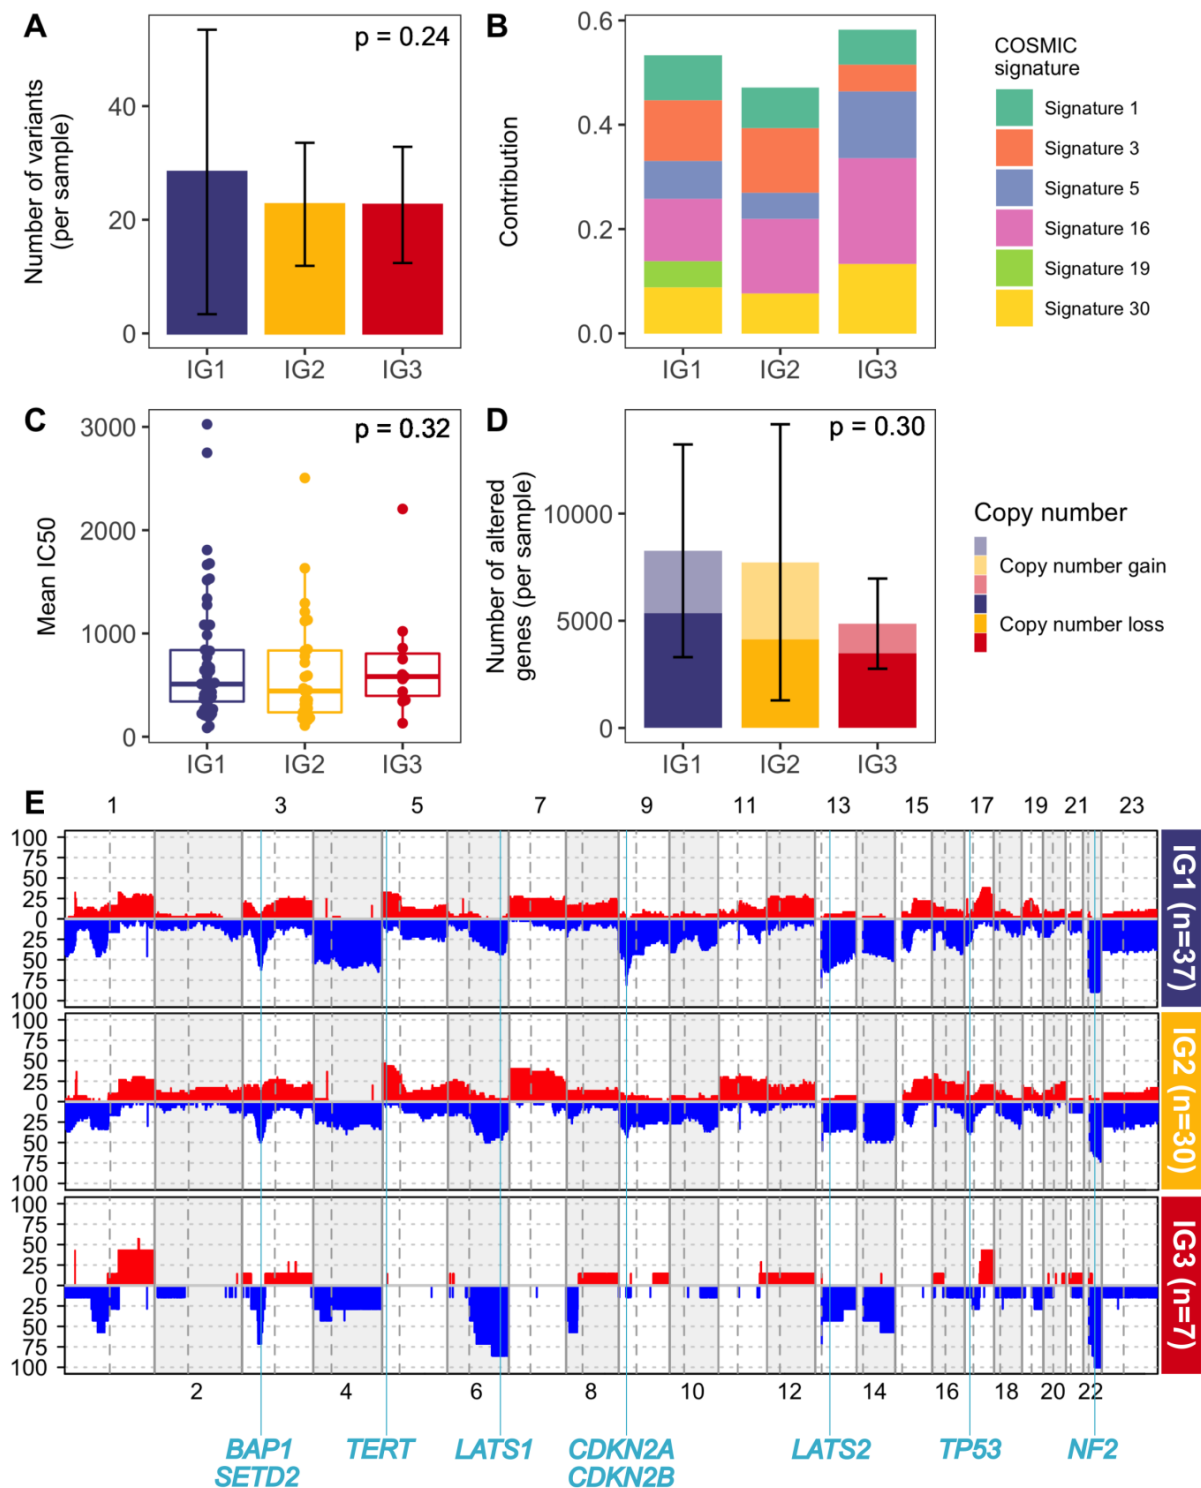

351

352 **Figure 3.** Genomic characterization

353 A) Tumour mutational burden among immune groups. Mean number of variants per sample.

354 Error bars indicate SD. B) Distribution of COSMIC mutational signatures among each

355 immune group. C) Immunogenicity as the mean of IC50 affinity of mutations among immune

356 groups. D) Copy number burden among immune groups. Mean number of altered genes

357 per sample. Error bars indicate SD. Lighter colours show copy number gains while darker  
358 ones depict copy number losses. E) Genomic overview showing the percentage of samples  
359 with copy number alterations among each immune group. Landmark MPM genes are  
360 depicted according to their genomic location.

361

## 362 **Transcriptional cell cycle / immune system activity trade-off across immune** 363 **groups**

364 Next, we sought for gene expression differences among the three immune groups, to  
365 identify those genes with an increasing or decreasing pattern among the three  
366 groups. The results are depicted in Fig. 4A, which shows a high number of genes  
367 with decreasing expression from IG1 to IG3 tumors related to cell proliferation such  
368 as *CENPF* (centromere protein also known as mitosin), *BIRC5* (otherwise known as  
369 survivin, preventing apoptotic cell death), or kinesins like *KIF23*, involved in cell  
370 division. On the other hand, genes positively correlated with the immune groups  
371 include immune system related genes such as *HSH2D*, a target of T-cell activation  
372 signaling pathways, and *GNLY*, which encodes for a protein present in cytotoxic  
373 granules of cytotoxic T lymphocytes.

374 In order to capture more precisely the enriched pathways and biological functions of  
375 the genes identified in the previous analysis, we performed a pre-ranked GSEA  
376 using a set of transcriptional signatures covering a wide range of pathways, and the  
377 genes ranked according to their linear association with the immune groups. The  
378 results are shown in Fig. 4B and we observed that signatures more positively  
379 correlated with the immune group (i.e., more expressed in IG3 tumors) were mostly  
380 related to immune system and inflammatory response processes. Contrarily,  
381 signatures negatively correlated with the immune groups mostly relate to cell cycle

382 and epithelial mesenchymal transition, suggesting a trade-off between these  
383 molecular processes and the immune system.

384 Finally, since IG1 tumors appeared to be driven by cell cycle deregulation, we  
385 assessed the potential confounder effect among cell proliferation and immune  
386 groups. Therefore, we tested the association between the cell proliferation marker  
387 *MKI67* and the immune groups. Notably, regardless of *MKI67* expression levels, the  
388 association of the improving survival pattern across immune groups is upheld (Suppl.  
389 Fig. S6).

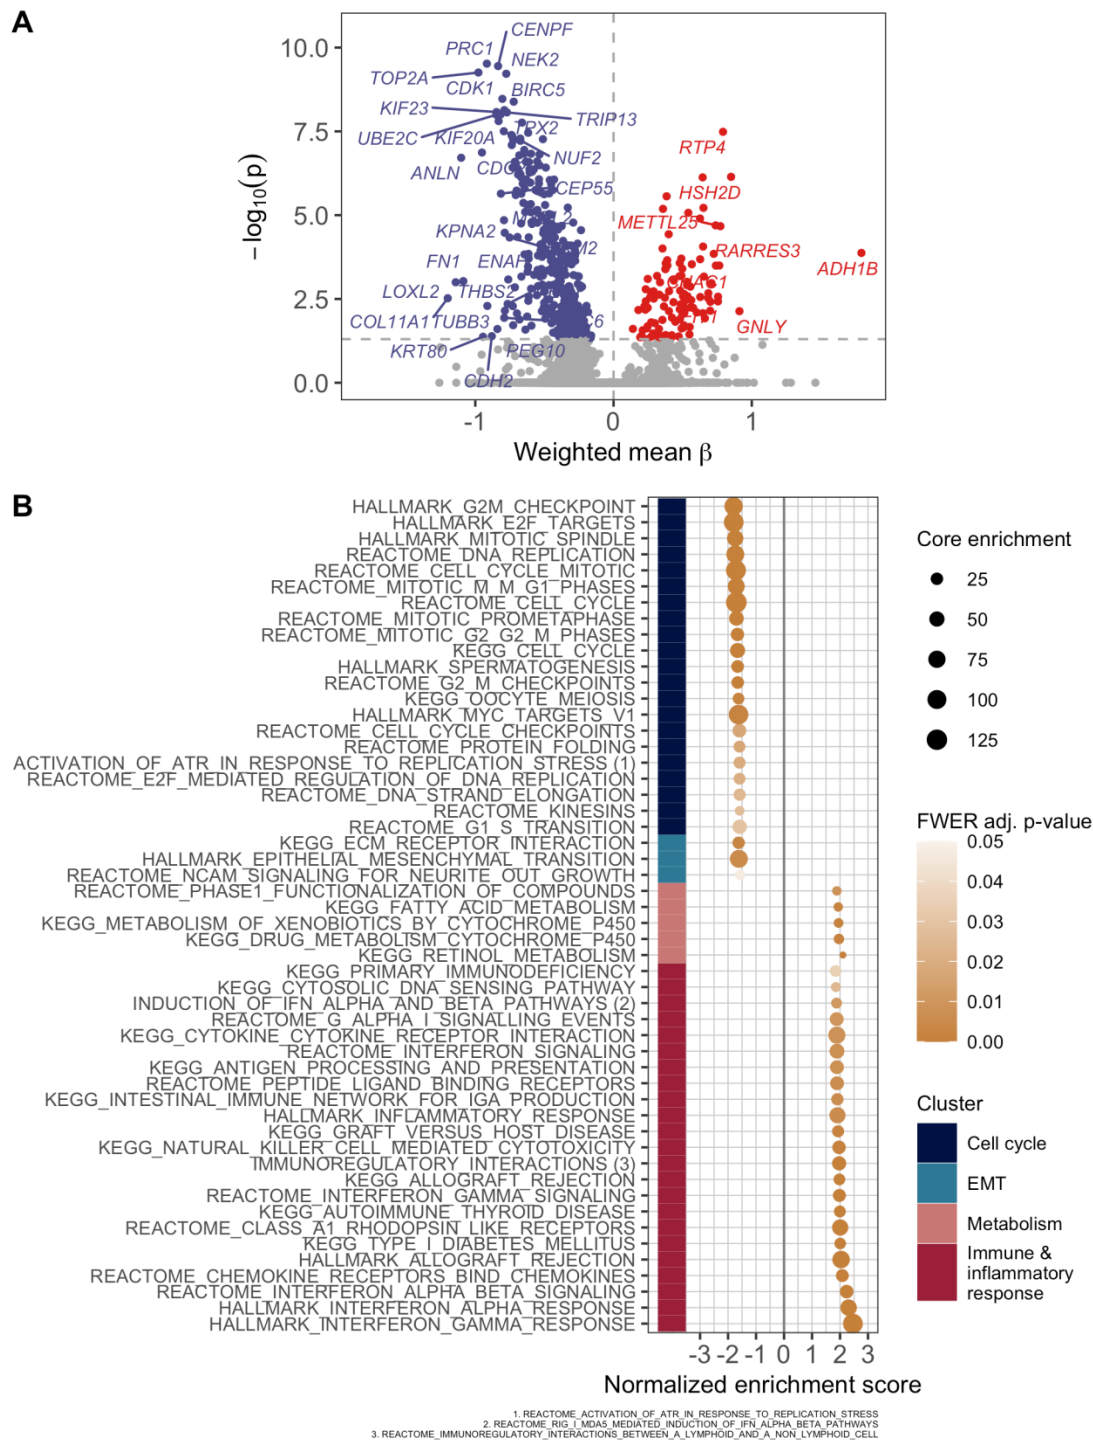

390

391 **Figure 4.** Transcriptomic characterization

392 A) Volcano plot of gene expression. Effect size ( $\beta$ ) correlates with immune groups. B)

393 Significant pathways from pre-ranked GSEA. Positive normalized enrichment scores

394 correlate with an increasing expression of pathway from IG1 to IG3, while negative ones

395 depict higher pathway expression for IG1 tumours vs. IG3 tumours. Pathways are clustered

396 using Ward's method and an odds-ratio based distance.

## 397 **Potential therapeutic strategies**

398 To further evaluate the potential clinical benefit of the immune-based MPM  
399 classification, we decided to assess the behavior of different treatment-response  
400 signatures among the three groups. We first wanted to identify whether there were  
401 any differences in the response to the currently available standard chemotherapy  
402 treatment based on the combination of cisplatin and pemetrexed. We obtained two  
403 expression-based signatures derived from non-small cell lung cancer that predicted  
404 resistance to pemetrexed[21] and to cisplatin.[22] Figure 5A displays GSVA scores  
405 for the two signatures across the three MPM immune groups. Overall, the results of  
406 the analysis suggested that MPM tumors in IG1 might be more resistant to  
407 pemetrexed, while IG3 tumors show a trend to lower resistance. On the other hand,  
408 cisplatin resistance analysis showed no differences between immune groups.

409 Next, we tested a large set of gene-expression signatures predictive of benefit from  
410 ICI treatment[25–31] to formally evaluate if MPM tumors in IG3 could benefit from an  
411 immune-based therapeutic approach (Fig. 5B). The overlap between these  
412 signatures and the classifier is almost non-existent (3 shared genes at most). We  
413 observed that all signatures were positively correlated with the immune groups, with  
414 IG3 tumors presenting a significant upregulation for all but one of the signatures.

415 Given the increased activation of cell cycle and DNA repair processes in the IG1  
416 group of MPM tumors, we wanted to explore whether any differences in sensitivity to  
417 cyclin dependent kinase inhibitors and to drugs that inhibit DNA repair among the  
418 three groups. To do that, we collected a signature of resistance to palbociclib derived  
419 from breast cancer[24] and another computationally-derived signature predicting  
420 sensitivity to DNA repair inhibition with PARP inhibitors.[23] (Fig. 5C). Despite a  
421 higher cycling nature of tumors in group IG1, they appear to be more resistant to

422 palbociclib than tumors in other groups, based on this predictive signature. Strikingly,  
423 tumors in IG1 showed increased sensitivity to PARP inhibitors compared to the other  
424 groups.

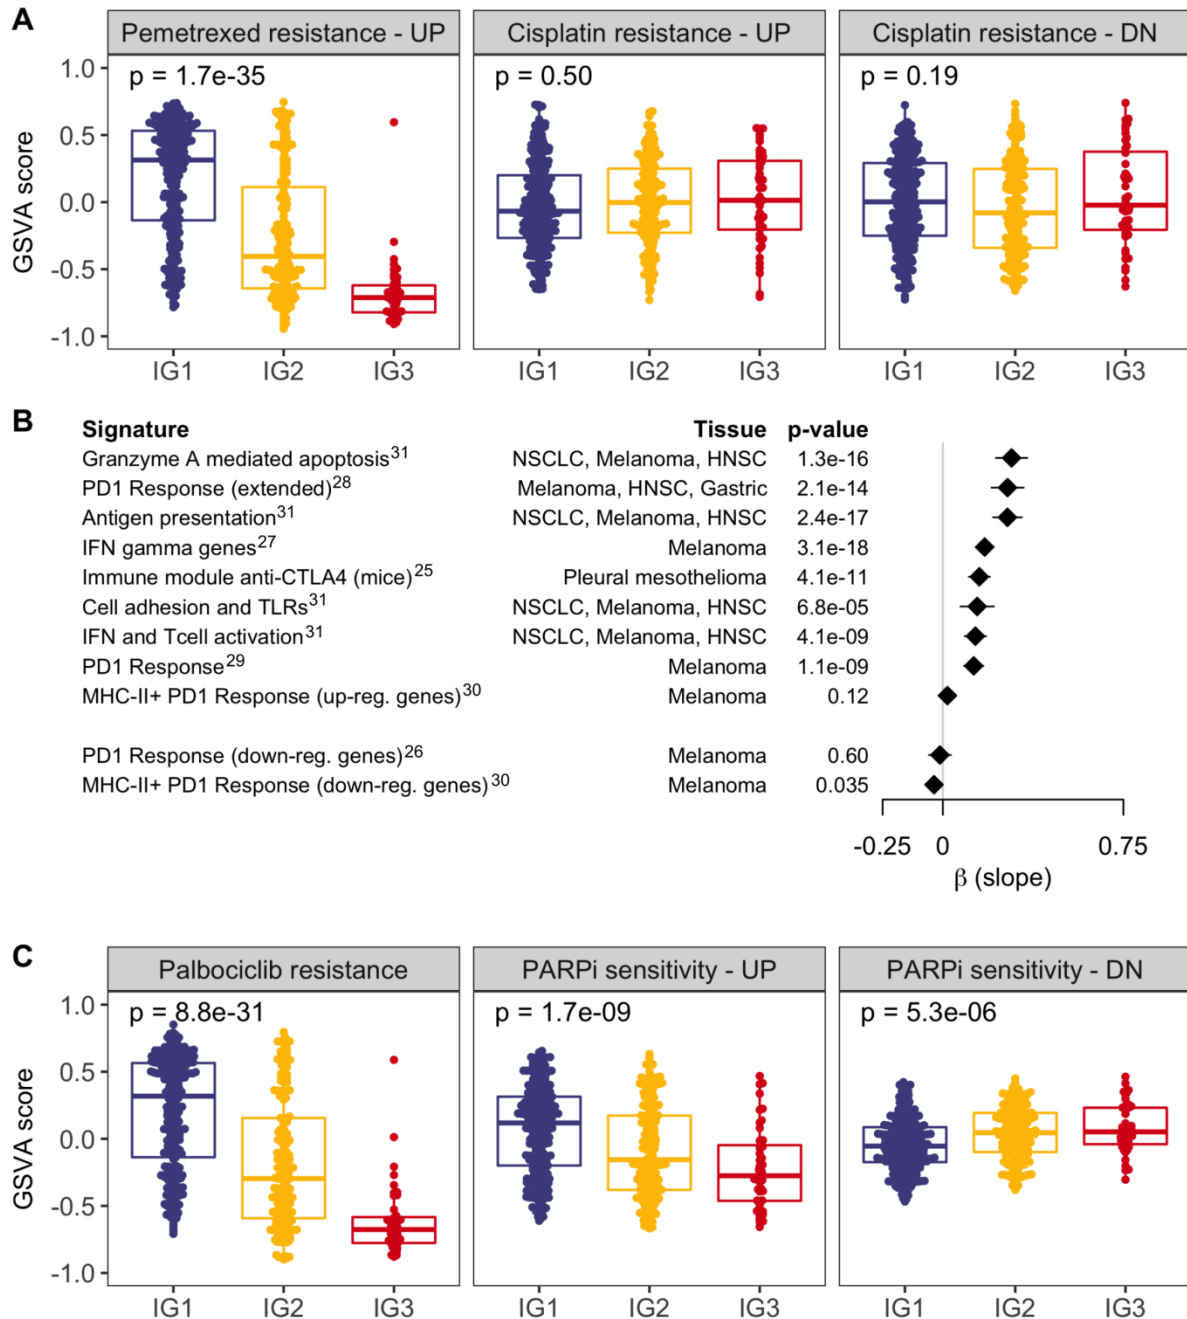

425  
426 **Figure 5.** Assessment of gene expression signatures predictive of benefit or resistance to  
427 multiple treatments.

428 GSVAscore for each sample allowed to test resistance to first-line chemotherapy (A);  
429 response to immunotherapy (B), and resistance or sensitivity to targeted therapy (C).

430 Superscripts in immunotherapy signatures correspond to bibliographic references. Up-reg.:  
431 up-regulated; down-reg.: down-regulated.

432

## 433 **DISCUSSION**

434 In this study we performed a comprehensive analysis of publicly available  
435 transcriptome data from more than 500 MPM tumors in order to characterize the  
436 immune landscape of this disease. By the identification of immune cells associated  
437 with clinical outcome, we classified MPM tumors according to their T-helper 2 and  
438 cytotoxic T cell abundance levels. This classification stratifies patients into three  
439 groups that represent different immune infiltration patterns and are associated with  
440 distinct survival outcomes. The group with the shortest overall survival, IG1,  
441 represents more than 50% of the analyzed tumors, while IG3, with better prognosis,  
442 accounts for only 8.5% of the tumors. We observed an increasing pattern of  
443 abundance for most immune fractions across the three immune groups. Interestingly,  
444 the survival benefit of this classification is consistent in both epithelioid and non-  
445 epithelioid tumors. We further characterized these three MPM immune groups at the  
446 genomic and transcriptomic levels, and identified potential therapeutic strategies  
447 using predictive signatures and large-scale pharmacogenomics data.

448 Different immune-related MPM phenotypes have already been described in recent  
449 studies using comprehensive approaches.[34–38] These studies use different  
450 techniques such as Nanostring™ technology,[35] mass cytometry,[34] or RNA-  
451 sequencing.[37] The diversity of obtained results suggests that the composition and  
452 role of the tumor microenvironment in MPM is remarkably complex and controversial,  
453 and thus further studies will contribute to elucidate this question.



454 In our work, MPM tumors are classified based on T<sub>H2</sub> and T<sub>C</sub> cells abundance, as  
455 previously stated. T<sub>H2</sub> are CD4<sup>+</sup> T cells which are induced by the presence of  
456 interleukin 4 (IL4) via STAT6 signaling and regulate humoral immune responses and  
457 responses to extracellular pathogens. T<sub>H2</sub> cells secrete IL4, IL5, IL10 and IL13 which  
458 promote immune suppression by inhibiting T-Helper 1 cytokine production.  
459 Additionally, a recent study identified higher levels of IL5 and IL13 after exposure to  
460 asbestos in mesothelial cells.[39] The role of T<sub>H2</sub> cells in cancer has been found to  
461 be dual and context-dependent. While they can generate antitumor immunity by  
462 recruiting specific populations of innate immune cells, they have also been found to  
463 increase tumorigenicity in certain experimental models.[40] Consistent with our  
464 results, higher levels of T<sub>H2</sub> cells have already been associated with poor prognosis  
465 in multiple cancer types.[41–43] Finally, in the analysis performed by Hmeljak et  
466 al.,[7] this signature has already been associated to the group with the worst  
467 prognosis.

468 On the other hand, CD8<sup>+</sup> T<sub>C</sub> cells are essential actors of the effector function of  
469 adaptive cellular immune response.[44] Along with natural killer (NK) cells, T<sub>C</sub> cells  
470 are ultimately responsible for targeting and attacking cancer cells by secreting  
471 cytotoxins (e.g., granzymes and perforins) which reach the tumor cell cytoplasm and  
472 trigger a caspase-mediated apoptotic process.[45] Additionally, in agreement with  
473 our study, a recent pan-cancer study observed that patients with tumors with higher  
474 T<sub>C</sub> infiltration tended to have better survival than patients with less T<sub>C</sub>-infiltrated  
475 tumors.[46]

476 While most immune checkpoints correlate with the defined immune groups, *CD276*  
477 (*B7-H3*) shows an opposite pattern of expression, with decreasing expression from  
478 IG1 to IG3. *CD276* is a member of the B7 family of immunoregulatory proteins and is

479 overexpressed in distinct tumor types. It has been shown that *CD276* can promote  
480 tumor proliferation, angiogenesis and metastasis and is associated with shorter  
481 survival time.[47] This result ties in with the survival pattern among the groups as  
482 well as with results from functional analysis in which cell cycle shows a decreasing  
483 pattern from IG1 to IG3. Similarly, *CD44* is the only T-cell exhaustion marker that  
484 shows negative correlation with the immune groups. This marker has been  
485 associated with metastasis and low survival rate in multiple cancer types, and  
486 chemoresistance in prostate and head and neck squamous cell cancer types.[48] In  
487 MPM, *CD44* has been shown to promote invasiveness when interacting with  
488 hyaluronan.[49]

489 Regarding molecular characteristics, immune groups were not significantly  
490 correlated with specific genomic alterations in terms of gene mutations or copy  
491 number alterations, yet there seems to be a pattern of decreasing genomic instability  
492 among the groups. Genomic instability, higher in IG1, is also supported by the  
493 analysis of mutational signatures, revealing a possible stronger presence of DNA  
494 damage repair deficiency by means of homologous recombination repair. In terms of  
495 copy number, no global differences were found among MPM groups, possibly due to  
496 the smaller sample size (only one dataset with available data). However, genomic  
497 regions like 9p21, harboring landmark genes in MPM as *CDKN2A* or type I interferon  
498 gene cluster, were likely to be lost in the IG1 compared to the other two groups.

499 Transcriptomic characterization of these groups by gene enrichment analysis  
500 revealed a trade-off between immune response activity and cell proliferation  
501 mechanisms, showing higher activation of cell cycle in IG1 tumors, in agreement with  
502 genomic characteristics. This trade-off has already been described in other studies,

503 reinforcing the hypothesis that cell cycle regulators and genomic instability could also  
504 have an impact on immune checkpoints.[46,50]  
505 Finally, the lack of effective therapeutic strategies beyond chemotherapy in MPM  
506 calls for assessment of potential options and tailoring for each subset of patients.  
507 Currently several phase III clinical trials are assessing the role of ICI in combination  
508 with chemotherapy in the first line setting of patients with advanced MPM. The  
509 results of the CheckMate-743 trial evaluating nivolumab plus ipilimumab versus  
510 platinum-based chemotherapy in previously untreated MPM are eagerly awaited,  
511 since this trial met its primary endpoint of overall survival. In this sense, the  
512 treatment landscape of advanced MPM is likely to evolve and predictive markers of  
513 ICI benefit are needed. In our work, we observed that patients belonging to IG3 may  
514 benefit from pemetrexed and immunotherapy, while no group showed any strong  
515 predisposition to benefit from chemotherapy with cisplatin treatment. Moreover,  
516 tumors in IG1 appear to be more sensitive to PARP inhibitors. This coincides with a  
517 higher proportion of genomic instability and mutational signature 3, associated with  
518 BRCA deficiency. It is important to stress that this classification needs further  
519 validation in a prospective cohort to identify the most suitable therapeutic strategy for  
520 patients in each immune group. It is also important to point out that this study  
521 focused on gene expression signatures as proxies since there is no information  
522 regarding immunotherapy in large pharmaco-genomic assays and also that even  
523 though pemetrexed and cisplatin are commonly administered in combination; we  
524 assessed their effect as single therapies due to the lack of signatures for the  
525 combined treatment.  
526 To sum up, this study identifies a novel signature with potential clinical relevance  
527 based on  $T_{H2}$  and  $T_C$  levels and unveils a small fraction of MPM tumors that show

528 better prognosis. These groups have different characteristics, both at the genomic  
529 and transcriptomic levels, and these differences could be used to tailor potential  
530 therapies for each group in the future. Further research is needed towards the  
531 identification of a reduced signature valid for FFPE samples, and validation of these  
532 results is warranted in an independent and prospective cohort of MPM tumors  
533 preferentially treated with ICI.

534

### 535 Declarations

#### 536 *Acknowledgements*

537 We thank CERCA Programme / Generalitat de Catalunya for institutional support.

538 We thank all the researchers who kindly put their research data for public use.

539 Bueno et al. data was accessed through a data transfer agreement with Genentech

540 (DAT-015429).

#### 541 *Funding*

542 This work is supported by the Carlos III National Health Institute funded by FEDER

543 funds – a way to build Europe – [PI14/01109; PI18/00920]; the Government of

544 Catalonia [2017SGR448].

545 XS is supported by RTI2018-102134-A-I00 grant funded by Spanish Ministry of

546 Science and Innovation. EN received support from the SLT006/17/00127 grant,

547 funded by the Department of Health of the Generalitat de Catalunya by the call

548 “Acció instrumental d’intensificació de professionals de la salut”. This study has been

549 funded by Sociedad Española de Oncología Médica (SEOM) through “Proyectos de

550 Investigación para Grupo Emergente”.

#### 551 *Authors’ contributions*

552 XS and EN conceived and designed the study. AA and DC performed the  
553 computational and statistical analysis. XS, EN, AA, DC, SHP, and EA contributed to  
554 the interpretation of the results. XS, EN, AA, and DC drafted the manuscript. ALD,  
555 RM, RP, RL, IE, RR, SP, and VM provided critical revisions of the article. All authors  
556 read and approved the final manuscript.

#### 557 *Competing interests*

558 VM is consultant to Bioiberica S.A.U. and Grupo Ferrer S.A., received research  
559 funds from Universal DX, and is coinvestigator in grants with Aniling. EN participated  
560 in advisory boards from Bristol Myers Squibb, Merck Sharpe & Dohme, Lilly, Roche,  
561 Pfizer, Takeda, Boehringer Ingelheim, Amgen and AstraZeneca. The other authors  
562 have no conflicts of interest to declare.

#### 563 *Ethics approval and consent to participate*

564 Not required.

#### 565 *Data availability statement*

566 Data used in this study are available in public, open access repositories.

567

#### 568 List of abbreviations

569 FDR: False Discovery Rate

570 GSEA: Gene Set Enrichment Analysis

571 GSVA: Gene Set Variation Analysis

572 ICI: Immune Checkpoint Inhibitors

573 MPM: Malignant Pleural Mesothelioma

574 PD1: Programmed Cell Death Protein 1

575 PD-L1: Programmed Death Ligand 1

576 T<sub>C</sub>: Cytotoxic T cells

577 T<sub>H2</sub>: T-helper 2 cells

578 TMB: Tumor Mutational Burden

579

580 **REFERENCES**

581 1 Meyerhoff RR, Yang C-FJ, Speicher PJ, *et al.* Impact of mesothelioma  
582 histologic subtype on outcomes in the Surveillance, Epidemiology, and End Results  
583 database. *J Surg Res* 2015;**196**:23–32. doi:10.1016/j.jss.2015.01.043

584 2 Kindler HL, Ismaila N, Armato SG, *et al.* Treatment of Malignant Pleural  
585 Mesothelioma: American Society of Clinical Oncology Clinical Practice Guideline. *J*  
586 *Clin Oncol* 2018;**36**:1343–73. doi:10.1200/JCO.2017.76.6394

587 3 Yap TA, Aerts JG, Popat S, *et al.* Novel insights into mesothelioma biology  
588 and implications for therapy. *Nat Rev Cancer* 2017;**17**:475–88.  
589 doi:10.1038/nrc.2017.42

590 4 McCambridge AJ, Napolitano A, Mansfield AS, *et al.* Progress in the  
591 Management of Malignant Pleural Mesothelioma in 2017. *J Thorac Oncol*  
592 2018;**13**:606–23. doi:10.1016/j.jtho.2018.02.021

593 5 Scherpereel A, Wallyn F, Albelda SM, *et al.* Novel therapies for malignant  
594 pleural mesothelioma. *Lancet Oncol* 2018;**19**:e161–72. doi:10.1016/S1470-  
595 2045(18)30100-1

596 6 Bueno R, Stawiski EW, Goldstein LD, *et al.* Comprehensive genomic analysis  
597 of malignant pleural mesothelioma identifies recurrent mutations, gene fusions and  
598 splicing alterations. *Nat Genet* 2016;**48**:407–16. doi:10.1038/ng.3520

599 7 Hmeljak J, Sanchez-Vega F, Hoadley KA, *et al.* Integrative Molecular  
600 Characterization of Malignant Pleural Mesothelioma. *Cancer Discov* 2018;**8**:1548–  
601 65. doi:10.1158/2159-8290.CD-18-0804

- 602 8 Suraokar MB, Nunez MI, Diao L, *et al.* Expression profiling stratifies  
603 mesothelioma tumors and signifies deregulation of spindle checkpoint pathway and  
604 microtubule network with therapeutic implications. *Ann Oncol* 2014;**25**:1184–92.  
605 doi:10.1093/annonc/mdu127
- 606 9 de Reyniès A, Jaurand M-C, Renier A, *et al.* Molecular classification of  
607 malignant pleural mesothelioma: identification of a poor prognosis subgroup linked to  
608 the epithelial-to-mesenchymal transition. *Clin Cancer Res* 2014;**20**:1323–34.  
609 doi:10.1158/1078-0432.CCR-13-2429
- 610 10 Bott M, Brevet M, Taylor BS, *et al.* The nuclear deubiquitinase BAP1 is  
611 commonly inactivated by somatic mutations and 3p21.1 losses in malignant pleural  
612 mesothelioma. *Nat Genet* 2011;**43**:668–72. doi:10.1038/ng.855
- 613 11 López-Ríos F, Chuai S, Flores R, *et al.* Global gene expression profiling of  
614 pleural mesotheliomas: overexpression of aurora kinases and P16/CDKN2A deletion  
615 as prognostic factors and critical evaluation of microarray-based prognostic  
616 prediction. *Cancer Res* 2006;**66**:2970–9. doi:10.1158/0008-5472.CAN-05-3907
- 617 12 Gordon GJ, Rockwell GN, Jensen RV, *et al.* Identification of novel candidate  
618 oncogenes and tumor suppressors in malignant pleural mesothelioma using large-  
619 scale transcriptional profiling. *Am J Pathol* 2005;**166**:1827–40. doi:10.1016/S0002-  
620 9440(10)62492-3
- 621 13 Van der Auwera GA, Carneiro MO, Hartl C, *et al.* From FastQ data to high  
622 confidence variant calls: the Genome Analysis Toolkit best practices pipeline. *Curr*  
623 *Protoc Bioinformatics* 2013;**43**:11.10.1-11.10.33.  
624 doi:10.1002/0471250953.bi1110s43
- 625 14 Irizarry RA, Hobbs B, Collin F, *et al.* Exploration, normalization, and  
626 summaries of high density oligonucleotide array probe level data. *Biostatistics*

- 627 2003;**4**:249–64. doi:10.1093/biostatistics/4.2.249
- 628 15 Hänzelmann S, Castelo R, Guinney J. GSVA: gene set variation analysis for  
629 microarray and RNA-seq data. *BMC Bioinformatics* 2013;**14**:7. doi:10.1186/1471-  
630 2105-14-7
- 631 16 Bindea G, Mlecnik B, Tosolini M, *et al.* Spatiotemporal dynamics of  
632 intratumoral immune cells reveal the immune landscape in human cancer. *Immunity*  
633 2013;**39**:782–95. doi:10.1016/j.immuni.2013.10.003
- 634 17 Charoentong P, Finotello F, Angelova M, *et al.* Pan-cancer Immunogenomic  
635 Analyses Reveal Genotype-Immunophenotype Relationships and Predictors of  
636 Response to Checkpoint Blockade. *Cell Rep* 2017;**18**:248–62.  
637 doi:10.1016/j.celrep.2016.12.019
- 638 18 Pardoll DM. The blockade of immune checkpoints in cancer immunotherapy.  
639 *Nat Rev Cancer* 2012;**12**:252–64. doi:10.1038/nrc3239
- 640 19 Wherry EJ, Kurachi M. Molecular and cellular insights into T cell exhaustion.  
641 *Nat Rev Immunol* 2015;**15**:486–99. doi:10.1038/nri3862
- 642 20 Subramanian A, Tamayo P, Mootha VK, *et al.* Gene set enrichment analysis:  
643 a knowledge-based approach for interpreting genome-wide expression profiles. *Proc*  
644 *Natl Acad Sci USA* 2005;**102**:15545–50. doi:10.1073/pnas.0506580102
- 645 21 Hou J, Lambers M, den Hamer B, *et al.* Expression profiling-based subtyping  
646 identifies novel non-small cell lung cancer subgroups and implicates putative  
647 resistance to pemetrexed therapy. *J Thorac Oncol* 2012;**7**:105–14.  
648 doi:10.1097/JTO.0b013e3182352a45
- 649 22 Whiteside MA, Chen D-T, Desmond RA, *et al.* A novel time-course cDNA  
650 microarray analysis method identifies genes associated with the development of  
651 cisplatin resistance. *Oncogene* 2004;**23**:744–52. doi:10.1038/sj.onc.1207164



- 652 23 McGrail DJ, Lin CC-J, Garnett J, *et al.* Improved prediction of PARP inhibitor  
653 response and identification of synergizing agents through use of a novel gene  
654 expression signature generation algorithm. *NPJ Syst Biol Appl* 2017;**3**:8.  
655 doi:10.1038/s41540-017-0011-6
- 656 24 Malorni L, Piazza S, Ciani Y, *et al.* A gene expression signature of  
657 retinoblastoma loss-of-function is a predictive biomarker of resistance to palbociclib  
658 in breast cancer cell lines and is prognostic in patients with ER positive early breast  
659 cancer. *Oncotarget* 2016;**7**:68012–22. doi:10.18632/oncotarget.12010
- 660 25 Lesterhuis WJ, Rinaldi C, Jones A, *et al.* Network analysis of immunotherapy-  
661 induced regressing tumours identifies novel synergistic drug combinations. *Sci Rep*  
662 2015;**5**:12298. doi:10.1038/srep12298
- 663 26 Hugo W, Zaretsky JM, Sun L, *et al.* Genomic and Transcriptomic Features of  
664 Response to Anti-PD-1 Therapy in Metastatic Melanoma. *Cell* 2016;**165**:35–44.  
665 doi:10.1016/j.cell.2016.02.065
- 666 27 Gao J, Shi LZ, Zhao H, *et al.* Loss of IFN- $\gamma$  Pathway Genes in Tumor Cells as  
667 a Mechanism of Resistance to Anti-CTLA-4 Therapy. *Cell* 2016;**167**:397-404.e9.  
668 doi:10.1016/j.cell.2016.08.069
- 669 28 Ayers M, Lunceford J, Nebozhyn M, *et al.* IFN- $\gamma$ -related mRNA profile predicts  
670 clinical response to PD-1 blockade. *J Clin Invest* 2017;**127**:2930–40.  
671 doi:10.1172/JCI91190
- 672 29 Chen P-L, Roh W, Reuben A, *et al.* Analysis of Immune Signatures in  
673 Longitudinal Tumor Samples Yields Insight into Biomarkers of Response and  
674 Mechanisms of Resistance to Immune Checkpoint Blockade. *Cancer Discov*  
675 2016;**6**:827–37. doi:10.1158/2159-8290.CD-15-1545
- 676 30 Johnson DB, Estrada MV, Salgado R, *et al.* Melanoma-specific MHC-II

- 677 expression represents a tumour-autonomous phenotype and predicts response to  
678 anti-PD-1/PD-L1 therapy. *Nat Commun* 2016;**7**:10582. doi:10.1038/ncomms10582
- 679 31 Prat A, Navarro A, Paré L, *et al.* Immune-Related Gene Expression Profiling  
680 After PD-1 Blockade in Non-Small Cell Lung Carcinoma, Head and Neck Squamous  
681 Cell Carcinoma, and Melanoma. *Cancer Res* 2017;**77**:3540–50. doi:10.1158/0008-  
682 5472.CAN-16-3556
- 683 32 Muller S, Victoria Lai W, Adusumilli PS, *et al.* V-domain Ig-containing  
684 suppressor of T-cell activation (VISTA), a potentially targetable immune checkpoint  
685 molecule, is highly expressed in epithelioid malignant pleural mesothelioma. *Mod*  
686 *Pathol* 2020;**33**:303–11. doi:10.1038/s41379-019-0364-z
- 687 33 Alexandrov LB, Nik-Zainal S, Wedge DC, *et al.* Signatures of mutational  
688 processes in human cancer. *Nature* 2013;**500**:415–21. doi:10.1038/nature12477
- 689 34 Lee H-S, Jang H-J, Choi JM, *et al.* Comprehensive immunoproteogenomic  
690 analyses of malignant pleural mesothelioma. *JCI Insight* 2018;**3**.  
691 doi:10.1172/jci.insight.98575
- 692 35 Patil NS, Righi L, Koeppen H, *et al.* Molecular and Histopathological  
693 Characterization of the Tumor Immune Microenvironment in Advanced Stage of  
694 Malignant Pleural Mesothelioma. *J Thorac Oncol* 2018;**13**:124–33.  
695 doi:10.1016/j.jtho.2017.09.1968
- 696 36 Blum Y, Meiller C, Quetel L, *et al.* Dissecting heterogeneity in malignant  
697 pleural mesothelioma through histo-molecular gradients for clinical applications. *Nat*  
698 *Commun* 2019;**10**:1333. doi:10.1038/s41467-019-09307-6
- 699 37 Alcala N, Mangiante L, Le-Stang N, *et al.* Redefining malignant pleural  
700 mesothelioma types as a continuum uncovers immune-vascular interactions.  
701 *EBioMedicine* 2019;**48**:191–202. doi:10.1016/j.ebiom.2019.09.003

- 702 38 Sneddon S, Rive CM, Ma S, *et al.* Identification of a CD8+ T-cell response to  
703 a predicted neoantigen in malignant mesothelioma. *Oncol Immunology*  
704 2020;**9**:1684713. doi:10.1080/2162402X.2019.1684713
- 705 39 Maki Y, Nishimura Y, Toyooka S, *et al.* The proliferative effects of asbestos-  
706 exposed peripheral blood mononuclear cells on mesothelial cells. *Oncol Lett*  
707 2016;**11**:3308–16. doi:10.3892/ol.2016.4412
- 708 40 Liudahl SM, Coussens LM. To Help or To Harm. In: *Immunology*. Elsevier  
709 2018. 97–116. doi:10.1016/B978-0-12-809819-6.00008-3
- 710 41 De Monte L, Reni M, Tassi E, *et al.* Intratumor T helper type 2 cell infiltrate  
711 correlates with cancer-associated fibroblast thymic stromal lymphopoietin production  
712 and reduced survival in pancreatic cancer. *J Exp Med* 2011;**208**:469–78.  
713 doi:10.1084/jem.20101876
- 714 42 Kusuda T, Shigemasa K, Arihiro K, *et al.* Relative expression levels of Th1  
715 and Th2 cytokine mRNA are independent prognostic factors in patients with ovarian  
716 cancer. *Oncol Rep* 2005;**13**:1153–8.
- 717 43 Nevala WK, Vachon CM, Leontovich AA, *et al.* Evidence of systemic Th2-  
718 driven chronic inflammation in patients with metastatic melanoma. *Clin Cancer Res*  
719 2009;**15**:1931–9. doi:10.1158/1078-0432.CCR-08-1980
- 720 44 Andersen MH, Schrama D, Thor Straten P, *et al.* Cytotoxic T cells. *J Invest*  
721 *Dermatol* 2006;**126**:32–41. doi:10.1038/sj.jid.5700001
- 722 45 Martínez-Lostao L, Anel A, Pardo J. How Do Cytotoxic Lymphocytes Kill  
723 Cancer Cells? *Clin Cancer Res* 2015;**21**:5047–56. doi:10.1158/1078-0432.CCR-15-  
724 0685
- 725 46 Tamborero D, Rubio-Perez C, Muiños F, *et al.* A Pan-cancer Landscape of  
726 Interactions between Solid Tumors and Infiltrating Immune Cell Populations. *Clin*

- 727 *Cancer Res* 2018;**24**:3717–28. doi:10.1158/1078-0432.CCR-17-3509
- 728 47 Seaman S, Zhu Z, Saha S, *et al.* Eradication of Tumors through Simultaneous  
729 Ablation of CD276/B7-H3-Positive Tumor Cells and Tumor Vasculature. *Cancer Cell*  
730 2017;**31**:501-515.e8. doi:10.1016/j.ccell.2017.03.005
- 731 48 Chen C, Zhao S, Karnad A, *et al.* The biology and role of CD44 in cancer  
732 progression: therapeutic implications. *J Hematol Oncol* 2018;**11**:64.  
733 doi:10.1186/s13045-018-0605-5
- 734 49 Cortes-Dericks L, Schmid RA. CD44 and its ligand hyaluronan as potential  
735 biomarkers in malignant pleural mesothelioma: evidence and perspectives. *Respir*  
736 *Res* 2017;**18**:58. doi:10.1186/s12931-017-0546-5
- 737 50 Wellenstein MD, de Visser KE. Cancer-Cell-Intrinsic Mechanisms Shaping the  
738 Tumor Immune Landscape. *Immunity* 2018;**48**:399–416.  
739 doi:10.1016/j.immuni.2018.03.004
- 740
